# Supplementary material for: Comparative molecular characterization of typical and exceptional responders in glioblastoma
Source: PubMed Central journal article supplement (PMC6033343; doi:10.18632/oncotarget.25420), 2018-06-19
Supplement: oncotarget-09-28421-s001.pdf [file oncotarget-09-28421-s001.pdf]

## Comparative molecular characterization of typical and exceptional responders in glioblastoma

### SUPPLEMENTARY MATERIALS

**Supplementary Table 1: Sample number by sex and response group for each data type**

|                          | Typical responders | Exceptional responders |
|--------------------------|--------------------|------------------------|
| <b>Somatic mutations</b> |                    |                        |
| Male                     | 20                 | 9                      |
| Female                   | 4                  | 15                     |
| <b>Copy number</b>       |                    |                        |
| Male                     | 27                 | 17                     |
| Female                   | 11                 | 17                     |
| <b>Methylation</b>       |                    |                        |
| Male                     | 10                 | 6                      |
| Female                   | 3                  | 13                     |
| <b>Gene expression</b>   |                    |                        |
| Male                     | 23                 | 16                     |
| Female                   | 11                 | 17                     |

**Supplementary Table 2: Genes with four or more patients affected by somatic mutations in at least one response group**

| <b>Gene</b>     | <b><i>n</i> (typical)</b> | <b><i>n</i> (exceptional)</b> |
|-----------------|---------------------------|-------------------------------|
| <i>TP53</i>     | 8                         | 9                             |
| <i>EGFR</i>     | 8                         | 7                             |
| <i>TTN</i>      | 4                         | 8                             |
| <i>MUC16</i>    | 8                         | 3                             |
| <i>PTEN</i>     | -                         | 7                             |
| <i>RYR2</i>     | 3                         | 6                             |
| <i>FLG</i>      | -                         | 6                             |
| <i>SYNE1</i>    | 5                         | 3                             |
| <i>LPA</i>      | 5                         | -                             |
| <i>MUC3A</i>    | 3                         | 4                             |
| <i>NF1</i>      | 3                         | 4                             |
| <i>CDH9</i>     | -                         | 4                             |
| <i>CKMT1A</i>   | 4                         | -                             |
| <i>FILIP1</i>   | 4                         | -                             |
| <i>KIAA1210</i> | 4                         | -                             |
| <i>MGAM</i>     | -                         | 4                             |
| <i>MROH2B</i>   | 4                         | -                             |
| <i>MUC4</i>     | -                         | 4                             |
| <i>NXF3</i>     | 4                         | -                             |
| <i>OGT</i>      | -                         | 4                             |
| <i>PACS1</i>    | 4                         | -                             |
| <i>PHLDB2</i>   | -                         | 4                             |
| <i>PIK3CA</i>   | 4                         | -                             |
| <i>PKHD1</i>    | 4                         | -                             |
| <i>PLB1</i>     | 4                         | -                             |
| <i>PLXNA2</i>   | 4                         | -                             |
| <i>RAD51AP2</i> | 4                         | -                             |
| <i>RELN</i>     | 4                         | -                             |
| <i>RYR3</i>     | 4                         | -                             |
| <i>SEC63</i>    | 4                         | -                             |
| <i>SLIT3</i>    | 4                         | -                             |
| <i>UMODL1</i>   | -                         | 4                             |
| <i>XIRP2</i>    | 4                         | -                             |

*N* indicates the number of patients with at least one somatic mutation identified in the associated gene. If fewer than three patients were affected, *N* is not listed.

**Supplementary Table 3: Significantly differentially methylated CpG sites**

| <b>cgid</b> | <b>gene name</b> | <b>mean <math>\beta</math> exceptional</b> | <b>mean <math>\beta</math> typical</b> | <b><math>\Delta\beta</math></b> | <b><i>p</i> value</b> |
|-------------|------------------|--------------------------------------------|----------------------------------------|---------------------------------|-----------------------|
| cg12343638  | <i>PCDHB12</i>   | 0.508                                      | 0.263                                  | 0.245                           | 0.001                 |
| cg08569678  | <i>LY6K</i>      | 0.442                                      | 0.178                                  | 0.264                           | 0.001                 |
| cg12052765  | <i>CHAT</i>      | 0.351                                      | 0.140                                  | 0.211                           | 0.001                 |
| cg03294619  | <i>NKX2-5</i>    | 0.364                                      | 0.089                                  | 0.275                           | 0.002                 |
| cg21480743  | <i>PTEN</i>      | 0.381                                      | 0.180                                  | 0.201                           | 0.002                 |
| cg04369341  | <i>C20orf100</i> | 0.635                                      | 0.427                                  | 0.209                           | 0.003                 |
| cg11532513  | <i>LRTM1</i>     | 0.406                                      | 0.630                                  | 0.224                           | 0.003                 |
| cg17651821  | <i>HIST1H4L</i>  | 0.514                                      | 0.256                                  | 0.258                           | 0.003                 |
| cg25957124  | <i>DNAH3</i>     | 0.705                                      | 0.477                                  | 0.228                           | 0.003                 |
| cg01888566  | <i>MEST</i>      | 0.741                                      | 0.522                                  | 0.219                           | 0.003                 |
| cg23519022  | <i>CAPZB</i>     | 0.535                                      | 0.743                                  | 0.209                           | 0.004                 |
| cg24101578  | <i>CDH22</i>     | 0.618                                      | 0.407                                  | 0.212                           | 0.004                 |
| cg25946389  | <i>MGMT</i>      | 0.395                                      | 0.180                                  | 0.215                           | 0.004                 |
| cg25509184  | <i>CFTR</i>      | 0.601                                      | 0.382                                  | 0.219                           | 0.004                 |
| cg09522147  | <i>KRT7</i>      | 0.589                                      | 0.367                                  | 0.222                           | 0.004                 |
| cg10303487  | <i>DPYS</i>      | 0.432                                      | 0.182                                  | 0.250                           | 0.007                 |
| cg09595479  | <i>PRPH</i>      | 0.732                                      | 0.527                                  | 0.205                           | 0.008                 |
| cg18676237  | <i>SERPINB9</i>  | 0.474                                      | 0.202                                  | 0.272                           | 0.009                 |
| cg12558519  | <i>KLHL26</i>    | 0.349                                      | 0.099                                  | 0.250                           | 0.010                 |
| cg26980692  | <i>SLC15A3</i>   | 0.401                                      | 0.190                                  | 0.211                           | 0.010                 |
| cg00949442  | <i>ABCA3</i>     | 0.424                                      | 0.221                                  | 0.203                           | 0.012                 |
| cg24264506  | <i>TTC12</i>     | 0.456                                      | 0.192                                  | 0.264                           | 0.013                 |
| cg16363586  | <i>BST2</i>      | 0.680                                      | 0.474                                  | 0.206                           | 0.013                 |
| cg27090216  | <i>TNFRSF10C</i> | 0.323                                      | 0.116                                  | 0.208                           | 0.014                 |
| cg13067215  | <i>CGI-38</i>    | 0.318                                      | 0.107                                  | 0.211                           | 0.014                 |
| cg20050826  | <i>K6IRS2</i>    | 0.412                                      | 0.211                                  | 0.201                           | 0.015                 |
| cg21215336  | <i>LRRC8E</i>    | 0.595                                      | 0.391                                  | 0.205                           | 0.016                 |
| cg12981137  | <i>MGMT</i>      | 0.376                                      | 0.150                                  | 0.226                           | 0.017                 |
| cg01009664  | <i>TRH</i>       | 0.461                                      | 0.249                                  | 0.212                           | 0.018                 |
| cg09160477  | <i>SUSD3</i>     | 0.275                                      | 0.067                                  | 0.207                           | 0.018                 |
| cg07753583  | <i>LRRC61</i>    | 0.626                                      | 0.417                                  | 0.209                           | 0.018                 |
| cg07952391  | <i>FLJ10916</i>  | 0.409                                      | 0.185                                  | 0.225                           | 0.019                 |
| cg23244913  | <i>HCG9</i>      | 0.543                                      | 0.333                                  | 0.211                           | 0.019                 |
| cg12177743  | <i>TTC12</i>     | 0.332                                      | 0.116                                  | 0.216                           | 0.019                 |
| cg06274159  | <i>ZFP42</i>     | 0.631                                      | 0.423                                  | 0.208                           | 0.019                 |
| cg25057743  | <i>PTHR2</i>     | 0.385                                      | 0.183                                  | 0.202                           | 0.022                 |
| cg07260592  | <i>LPA</i>       | 0.654                                      | 0.435                                  | 0.219                           | 0.022                 |
| cg17965019  | <i>HIST1H3J</i>  | 0.353                                      | 0.143                                  | 0.210                           | 0.024                 |
| cg17860158  | <i>CNTN2</i>     | 0.394                                      | 0.183                                  | 0.211                           | 0.026                 |
| cg12768605  | <i>LYPD5</i>     | 0.499                                      | 0.298                                  | 0.201                           | 0.034                 |
| cg00630164  | <i>KCNQ4</i>     | 0.489                                      | 0.277                                  | 0.212                           | 0.042                 |

These 41 CpG sites were determined to be differentially methylated between typical and exceptional responders following a cutoff of 0.2 and multiple testing correction ( $q < 0.1$ ). The raw  $p$  values are shown.

**Supplementary Table 4: Significantly differentially methylated promoters**

| gene name      | mean $\beta$ exceptional | mean $\beta$ typical | $\Delta\beta$ | combined $p$ value |
|----------------|--------------------------|----------------------|---------------|--------------------|
| <i>SLC15A3</i> | 0.401                    | 0.190                | 0.211         | 0.010              |
| <i>TTC12</i>   | 0.394                    | 0.154                | 0.240         | 0.012              |
| <i>LRRRC8E</i> | 0.595                    | 0.391                | 0.205         | 0.016              |
| <i>SUSD3</i>   | 0.275                    | 0.067                | 0.207         | 0.018              |
| <i>LRRRC61</i> | 0.626                    | 0.417                | 0.209         | 0.018              |

The promoters of these five genes were determined to be differentially methylated between typical and exceptional responders following a cutoff of 0.2 and multiple testing correction ( $q < 0.1$ ) based on the degree of methylation of all the CpG sites that fall within the promoter range (1.5 kb upstream and 0.5 kb downstream of the transcription start site) for each gene. The raw combined  $p$  values are shown.

**Supplementary Table 5: Significantly differentially expressed genes**

| Gene          | $\log_2FC$ (all) | $\log_2FC$ (female) | $\log_2FC$ (male) | $p$ value (all) | $p$ value (female) | $p$ value (male) |
|---------------|------------------|---------------------|-------------------|-----------------|--------------------|------------------|
| <i>ETNPPL</i> | 1.553            | 1.931               | 1.659             | 0.023           | 0.070              | 0.056            |
| <i>SH3GL2</i> | 1.771            | 2.301               | 1.758             | 0.002           | 0.009              | 0.021            |
| <i>CXCL8</i>  | -1.735           | -3.094              | -1.904            | 0.004           | 0.001              | 0.033            |
|               | -1.863           | -2.345              |                   | 0.005           | 0.013              |                  |
| <i>CCL20</i>  | -1.751           | -2.383              | -1.520            | 0.004           | 0.016              | 0.049            |

Four genes were determined to be significantly differentially expressed between typical and exceptional responders following multiple testing correction ( $q < 0.1$ ) and comparison to the sex-specific analyses. *CXCL8* had two significant probes.  $\log_2$  fold change and  $p$  values are shown for the full analysis and for each sex-specific analysis. *ETNPPL* and *SH3GL2* are more highly expressed in exceptional responders and *CXCL8* and *CCL20* are more highly expressed in typical responders.

**Supplementary Table 6: Enriched gene sets identified by GSEA**

| Name                                                    | Enriched in | Normalized enrichment score | $p$ value   | FDR $q$ value |
|---------------------------------------------------------|-------------|-----------------------------|-------------|---------------|
| regulation of synaptic vesicle transport                | exceptional | 2.062                       | $p < 0.001$ | 0.124         |
| regulation of neurotransmitter transport                | exceptional | 2.025                       | $p < 0.001$ | 0.113         |
| positive regulation of calcium ion dependent exocytosis | exceptional | 2.008                       | $p < 0.001$ | 0.109         |
| neurotransmitter secretion                              | exceptional | 2.006                       | $p < 0.001$ | 0.078         |
| negative regulation of cytokine biosynthetic process    | typical     | -2.068                      | $p < 0.001$ | 0.154         |

GSEA identified five enriched gene sets, four of which are enriched in exceptional responders.
